# Supplementary material for: tRNA-derived fragments tRFGlnCTG induced by arterial injury promote vascular smooth muscle cell proliferation
Source: PubMed Central journal article supplement — Mol Ther Nucleic Acids. 2020 Dec 15;23:603–13. doi: 10.1016/j.omtn.2020.12.010 (PMC7819823; doi:10.1016/j.omtn.2020.12.010), 2020-12-15
Supplement: mmc1.pdf [file mmc1.pdf]

OMTN, Volume 23

## Supplemental Information

**tRNA-derived fragments tRF<sup>GlnCTG</sup>**

**induced by arterial injury promote**

**vascular smooth muscle cell proliferation**

**Xiao-Ling Zhu, Tao Li, Yu Cao, Qing-Ping Yao, Xing Liu, Ying Li, Yang-Yang Guan, Ji-Jun Deng, Rui Jiang, and Jun Jiang**

A

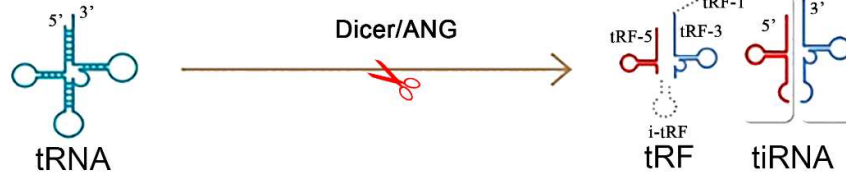

B

real-time qPCR procedure of tRF / tiRNA

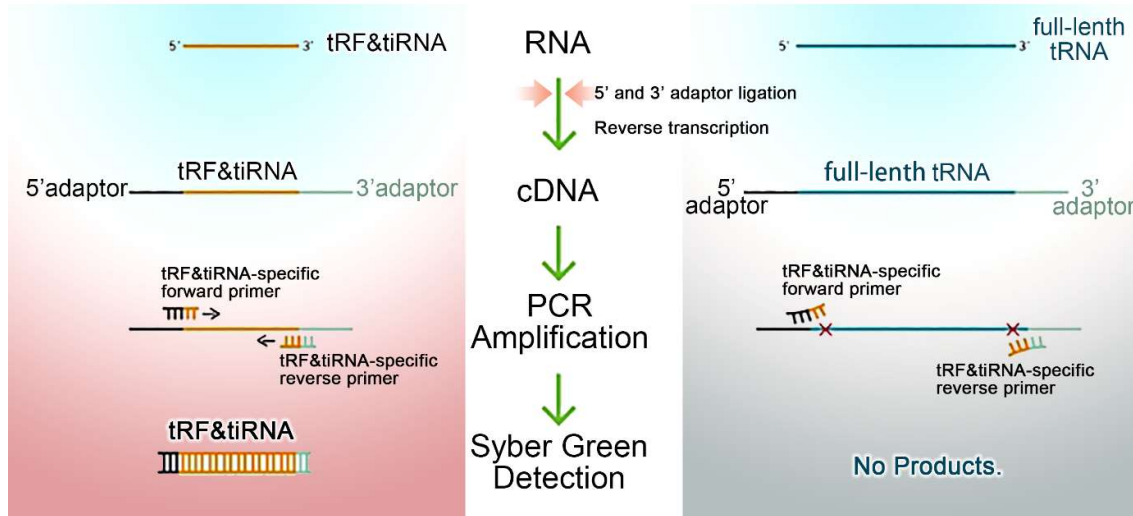

**Figure S1. The formation of tRF/tiRNA and the PCR detection process.**

(A) tRFs & tiRNAs are derived from the cleavage of tRNA by Dicer or angiogenin (Ang). (B) By introducing 5' and 3' adaptors, the specific tRF&tiRNAs was detected with no amplification of tRNA or pre-tRNAs.
